# Supplementary material
Source: PubMed Central journal article supplement (PMC1757082)
Supplement: jepicomh_59_7_551__1.pdf [file jepicomh_59_7_551__1.pdf]

## **Participating centres in the WHO MONICA Project**

Australia-University of Newcastle, Newcastle: A Dobson (principal investigator), H Alexander, R Heller, P Colley.

Belgium-Ghent State University, Ghent: G De Backer (principal investigator), F van Onsem, S De Henauw, D De Bacquer; Free University of Brussels, Brussels: M Kornitzer (principal investigator), L Berghmans, M Lannoy, R Desqueve, L Bara, I Beriot, M Candeur, P de Smet.

Canada-Dalhousie University, Halifax, Nova Scotia: R D Gregor (principal investigator), H K Wolf (principal investigator), B R Mackenzie, P M Rautaharju, I R Bata.

China-Beijing Institute of Heart, Lung and Blood Vessel Diseases, Beijing: Wu Zhaosu (principal investigator), Wu Yinkai (former principal investigator), Yao Chonghua, Zhao Dong.

Czech Republic-Institute for Clinical and Experimental Medicine, Prague: Z Skodová (principal investigator), Z Pisa, Z Hejl, P Vojtisek, K Emrová, Z Cícha, L Berka, M Hoke, J Pikhartová, K Hrdlicíková, E Wiesner.

Finland-National Public Health Institute, Helsinki; University of Kuopio, Department of Medicine and Department of Community Health and General Practice; Health Office, City of Turku and Turku University Hospital, Department of Medicine; North Karelia Central Hospital, Department of Medicine; Loimaa District Hospital, Department of Medicine: J Tuomilehto (principal investigator), P Puska (former principal investigator), M Arstila, P Immonen-Räihä, E Kaarsalo, M Ketonen, S Lehto, H Miettinen, H Mustaniemi, M Niemelä, P Palomäki, K Pyörälä, M Romo, V Salomaa, J Torppa, T Vuorenmaa.

France-National Institute of Health and Medical Research (INSERM U258) Paris: P Ducimetiere (country coordinator), J L Richard (former country coordinator), A Bingham, T Lang; National Institute of Health and Medical Research (INSERM U518), Toulouse: J Ferrieres (principal investigator), J B Ruidavets, P Marqués-Vidal, J P Cambou (former principal investigator), P Rodier, C Saulet; Department of Epidemiology and Public Health, Faculty of Medicine, Strasbourg: D Arveiler (principal investigator), P Schaffer (principal investigator), A Facello, E Marine Barjoan, E Uettwiller, D Jacques, C Veron, V Meyer, M Velten, B Haas, N Lamamy, A Wagner, F Pierau, V Goetz.

Germany-Bremen Institute for Prevention Research and Social Medicine, Bremen: E Greiser (principal investigator), B Herman (coprincipal investigator), G Stüdemann; GSF-Institute for Epidemiology, Munich and Institute for Epidemiology and Social Medicine, University of Münster: U Keil (principal investigator), H Löwel, M Lewis, A

Hörmann, J Gostomzyk, HD Bolte; Centre for Epidemiology and Health Research, Berlin: W Barth (principal investigator), L Heinemann (principal investigator), E Classen, D Quietzsch, S Brasche, S Böthig, G Voigt.

Iceland-Heart Preventive Clinic, Reykjavik: N Sigfusson (principal investigator), Il Gudmundsdottir, I Stefansdottir, Th Thorsteinsson, H Sigvaldason.

Italy-National Institute of Health, Rome: A Menotti (country coordinator), S Giampaoli, A Verdecchia; Institute of Cardiology, Regional Hospital, Udine: D Vanuzzo (principal investigator), G A Feruglio (former principal investigator), L Pilotto, G Zanata, M Scarpa, G B Cignacco, R Marini, M Spanghero, G Zilio; Research Centre for Chronic Degenerative Diseases, University of Milan at Monza: G C Cesana (principal investigator), M Ferrario (principal investigator), M T Gussoni, G De Vito, R Sega, F Valagussa, F Achilli.

Lithuania-Kaunas Medical University, Institute of Cardiology: J Bluzhas (principal investigator), V Grinius, R Grazuleviciene, Z Petrokiene, D Rasteniene, D Rastenyte, R Radisauskas, D Sidlauskiene.

Russian Federation-National Research Centre for Preventive Medicine, Moscow: G Zhukovsky (principal investigator), T Varlamova (former principal investigator), R Oganov, V Naumova, N Popova.

Spain-Institute of Health Studies, Department of Health, Barcelona: S Sans (principal investigator), I Balaguer-Vintró (former principal investigator), A Puigdefàbregas, G Paluzie.

Sweden-Östra Hospital Preventive Cardiology Unit, Göteborg: L Wilhelmsen (principal investigator), S Johansson, M Falkman, G Lappas; Department of Internal Medicine, Kalix Lasarett, Kalix: T Messner (principal investigator), F Huhtasaari (former principal investigator), V Lundberg, E Jägare Westerberg, B Wikström, S Boström; Umeå University Hospital, Department of Medicine: B Stegmayr (principal investigator), K Asplund and PO Wester (former principal investigator), Åsa Johansson, Salmir Nasic.

Switzerland-University Institute of Social and Preventive Medicine, Lausanne: F Gutzwiller (principal investigator, Zürich), M Rickenbach, V Wietlisbach, F Barazzoni, F Paccaud.

UK-The Queen's University of Belfast, Northern Ireland: A E Evans (principal investigator), Z M Mathewson, E E McCrum, A Hall, T Falconer, E L McIlmoyle.

USA-Stanford Centre for Research in Disease Prevention, Stanford University, California: S P Fortmann (principal investigator), A Varady.

MONICA Management Centre-World Health Organization, Geneva: S Mendis (responsible officer, cardiovascular diseases), I Martin (former responsible officer,

CVD), I Gyarfás (former chief CVD), Z Pisa (former chief CVD), S R A Dodu (former chief CVD), S Böthig (former chief CVD), M J Watson, M Hill, A Price.

MONICA Data Centre-National Public Health Institute, Helsinki, Finland: K Kuulasmaa (responsible officer), J Tuomilehto (former responsible officer), M Mähönen, Z Cepaitis, H Tolonen, E Ruokokoski, A-M Rajakangas.

MONICA Quality Control Centre for ECG Coding-Hungarian Institute of Cardiology, Budapest, Hungary: P Ofner (responsible officer), A Madai (former responsible officer).

MONICA Quality Control Centre for Event Registration-University of Dundee, Scotland: Hugh Tunstall-Pedoe (responsible officer), Kristin Barrett, Colin Brown.

MONICA Steering Committee-J Tuomilehto (Chair), H Wolf (Publications Coordinator), A Dobson, S Sans, H Tunstall-Pedoe, S Mendis (WHO, Geneva), K Kuulasmaa (KTL, Helsinki, Finland), and previous steering committee members: P Amouyel, K Asplund, R Beaglehole, A Evans, M Ferrario, SP Fortmann, F Gutzwiller, M Hobbs, U Keil, A Menotti, A Pajak, P Puska, SL Rywik, and former Chiefs of CVD/HQ, Geneva (listed above), A Shatchkute (WHO, Copenhagen), V Zaitsev (WHO, Copenhagen). Former Consultants: FH Epstein (Zürich, Switzerland), M Feinleib (Bethesda, USA), MJ Karvonen (Helsinki, Finland), Z Pisa (Prague, Czech Republic), RJ Prineas (Minneapolis, USA), OD Williams (Birmingham, Alabama, USA).
